# Supplementary material
Source: PubMed Central journal article supplement (PMC4114018)
Supplement: NIHMS586980-supplement-Fig__13.pdf [file NIHMS586980-supplement-Fig__13.pdf]

## Supplemental Figure 13

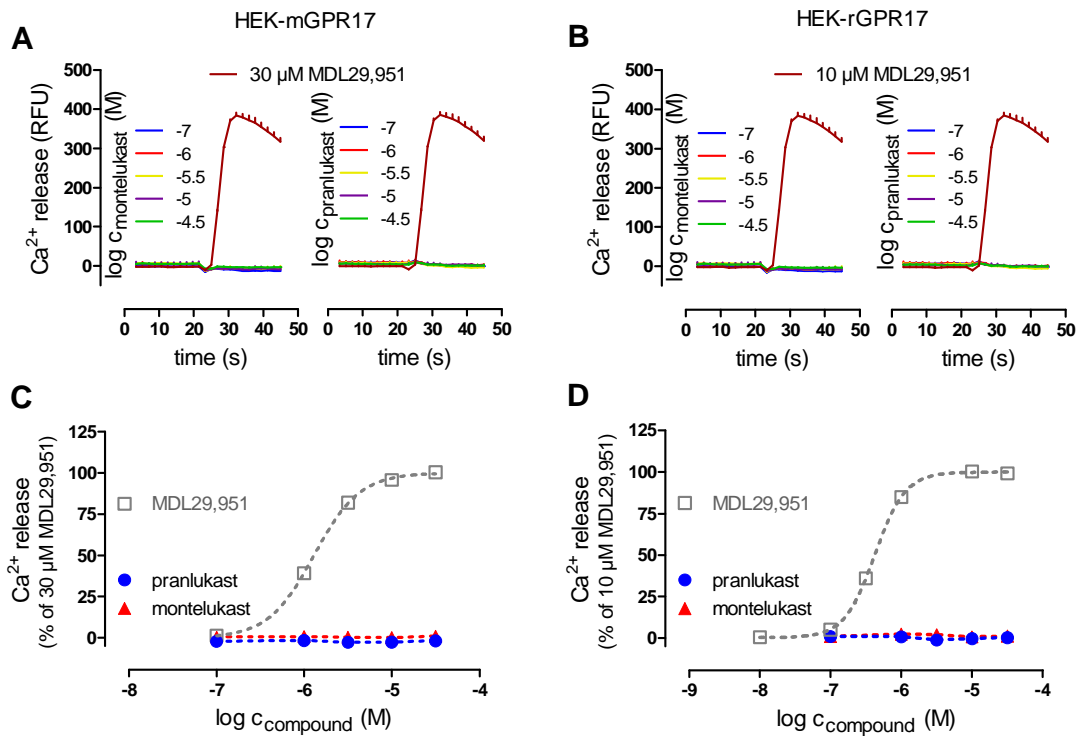

**Fig. S13. Pramlukast and montelukast do not activate rat and mouse GPR17.** (A to D) HEK293 cells stably expressing mouse (m) GPR17 (A and C) or rat (r) GPR17 (B and D) were treated with the indicated concentrations of CysLT<sub>1</sub> antagonists or GPR17 agonist MDL29,951 as positive control and  $\text{Ca}^{2+}$  mobilization was recorded over time. (A and B) Data are representative real-time  $\text{Ca}^{2+}$  traces + S.E or (C and D) mean  $\pm$  S.E.M. of two to four independent experiments, each performed in triplicate.
