# Supplementary material
Source: PubMed Central journal article supplement (PMC4114018)
Supplement: NIHMS586980-supplement-Fig__S1.pdf [file NIHMS586980-supplement-Fig__S1.pdf]

# Supplementary Materials

## Supplemental Figure 1

| TM1 |                                                        | TM2                      |                              |     |        |             |
|-----|--------------------------------------------------------|--------------------------|------------------------------|-----|--------|-------------|
| 61  | LFASFYLLDFILALVGNLALWLFIRDHKSQTPANVFLM                 | LAVADLSCVLLVLP           | TRLVYHF                      | 120 | Q13304 | GPR17_HUMAN |
| 25  | WYSTLYSHISVUVCFPCNGFVLYVLIKTYHKS                       | SAFOVYMINLAWADLLCVCTLPLR | VVYV                         | 84  | Q9Y271 | CLTR1_HUMAN |
| 40  | FFPIVYLLIFWFCVLCNGLSIYVFLQPYKRST                       | SVNVMFLNLAI              | SDLLFISTLPPFRADYLL           | 99  | Q9NS75 | CLTR2_HUMAN |
| 53  | YLPNAVYLLVFTICFLCNSVAIWMFVFMHPW                        | SGISVYHFNALADFLYVLTLP    | PALIFYYF                     | 112 | P47900 | P2RY1_HUMAN |
| 27  | LPPLLYTVLFFVGLITNGLAMRIFF-QIRSKSN                      | FIIFLNTVISDLLMLT         | FPFKILSDA                    | 85  | Q9H244 | P2Y12_HUMAN |
| 35  | YLPVIYGLIFLVGFCNAVVISYIFKMPWKSST                       | IIMLNLA                  | CTDLLYLTSLPFLIHYYA           | 94  | Q96P68 | OXGR1_HUMAN |
| 25  | YLSIFGIEFVVVGVLCNTIVVYGYIFSLK                          | NWSSNIYLFNLSVSDLAFLCTLP  | PLIRSYA                      | 84  | Q9BXA5 | SUCR1_HUMAN |
|     | * : : : : * : : : : * : : : : *                        |                          |                              |     |        |             |
| TM3 |                                                        |                          |                              |     |        |             |
| 121 | SCNHWPFGRIACRLTGFLFYLNMYASIIYFL                        | TCISADRFLAIVHPVKS        | SLRRLRPLYA                   | 180 | Q13304 | GPR17_HUMAN |
| 85  | HKGIWFLGDFLCLSTYALYVNLVYCSIFFHT                        | AMSFFCIAIVFPVQMINLVTQ    | KARFVC                       | 144 | Q9Y271 | CLTR1_HUMAN |
| 100 | RGSNWFCDLACRIMSYSLYVNMYSIIYFL                          | TVLSVVF                  | LAMVFPFLLHVTSIRSANILC        | 159 | Q9NS75 | CLTR2_HUMAN |
| 113 | NKTDWIFGDAMCKLQAFIFVNLVYCSIL                           | FLTCISAHRYSCVVYPLKSLCRL  | KKKNAICIS                    | 172 | P47900 | P2RY1_HUMAN |
| 86  | KLGTGPLRTFVQCQVTSVIFFTMYISIS                           | IFLGLITIDRYQKTRPFR       | TSPKLLGAKILS                 | 145 | Q9H244 | P2Y12_HUMAN |
| 95  | SGENWIFGDFMCKFIIFSFHFNLYSSIL                           | FLTCFSIF                 | YCVIIIPMSCFSIHKTRCAVAVAC     | 154 | Q96P68 | OXGR1_HUMAN |
| 85  | NG-NWICYGDVLCISNRYVLHANLYTSIL                          | FLTFISIDYLLIKYFPREHLLQ   | KKEFALLIS                    | 143 | Q9BXA5 | SUCR1_HUMAN |
|     | * : : : * * * : : * : *                                |                          |                              |     |        |             |
| TM4 |                                                        |                          |                              |     |        |             |
| 181 | AFLWVVAVAMAPLLVSPQTQVQTMH-TVV                          | CLQLYREKAS----           | HHALVSLAVAF                  | 234 | Q13304 | GPR17_HUMAN |
| 145 | VGCIWIFVLITSSPFLMAR                                    | PQRDEKN-NTRCFEPPQDNQTKNH | VLVLHYVSLFVGFILPFV           | 203 | Q9Y271 | CLTR1_HUMAN |
| 160 | GIWILIMASSIM-LDSCSEQNGS-VTSC                           | LELNLYK--IAKLQTMNYIALV   | GCCLLPFF                     | 215 | Q9NS75 | CLTR2_HUMAN |
| 173 | VLVWLVVVVAISPIIFYSCTGVREKNTI                           | TCYDITTSDEY-LRSYFIYSMCT  | TVAMFCVPLV                   | 231 | P47900 | P2RY1_HUMAN |
| 146 | VVITWAFMFLLSLPNMILNRPDRK                               | MVRRCSFLKSEFG-LVWHIVM    | YIC-QVIFWINFL                | 203 | Q9H244 | P2Y12_HUMAN |
| 155 | AVVVWISLWAVIPMTFLITSTNRTN-<br>RSACLDLTSSDE-LNTIKWYMLIL | TATTFCLPLV               |                              | 212 | Q96P68 | OXGR1_HUMAN |
| 144 | LAIWVLTLELLPILPLINPVITDN-<br>CTTCNDFASSGD-PNYNLIYSMCL  | TLLGFLIPLF               |                              | 201 | Q9BXA5 | SUCR1_HUMAN |
|     | * : : * : *                                            |                          |                              |     |        |             |
| TM5 |                                                        | TM6                      |                              |     |        |             |
| 235 | TTVTCYLLIIRSLRQGLRVE---KR                              | RTKAVMIAIVLAI            | FLVCFVFPVWNR                 | 288 | Q13304 | GPR17_HUMAN |
| 204 | IIIVCYTHIILTLKRSMEK---NLS                              | SHRKAIGMIMVVTAAFLV       | SFMPYHIQR                    | 258 | Q9Y271 | CLTR1_HUMAN |
| 216 | TLSICYLLIIRVLLKVEVPESC-LRV                             | SHRKLTTIIITLIIFFLC       | FLPLVYTLR                    | 272 | Q9NS75 | CLTR2_HUMAN |
| 232 | LILGCYCLLIVRALIYKD--L-D-NSP                            | LRKRIYLVIIVLTVFAVSYL     | FPVWMLMNL                    | 287 | P47900 | P2RY1_HUMAN |
| 204 | IIIVCYTHIIRKELYSYVTRCVGKVP                             | RRKRVVVFIIIAVFFIC        | FVFPFARIPYTL                 | 261 | Q9H244 | P2Y12_HUMAN |
| 213 | IIVTLCYTHIIRHGL--Q-T-DSC                               | LKQKARRLTILLLLAFV        | YVCFPLP                      | 268 | Q96P68 | OXGR1_HUMAN |
| 202 | VMCFYFKIALFLKQNRQV-A-TAL                               | PLEKLNLVIMAVVIFSVL       | FTFPVWNRVRIASR               | 259 | Q9BXA5 | SUCR1_HUMAN |
|     | * * * * *                                              | * : : * : *              |                              |     |        |             |
| TM7 |                                                        |                          |                              |     |        |             |
| 289 | --HYRSHGASCATQRILALANRITSCL                            | TSLNGALDPIN              | YFFVAEKRHALCNLLCGKRLK        | 346 | Q13304 | GPR17_HUMAN |
| 259 | --FLHNETKPCDSVLRMQKSVVITLS                             | LAAASCCFDPLLYFFSGGNFR    | KRLSTFRKHSLS                 | 316 | Q9Y271 | CLTR1_HUMAN |
| 273 | --TWKV--CLCK--DLHKA                                    | LVITLALAAANACFNPLLY      | YFACENFDRKLSALRKC            | 323 | Q9NS75 | CLTR2_HUMAN |
| 288 | LDFQTP--AMCAFNDRVYATYQVT                               | GLASLNSCVDPILYFL         | ACDTFRRLRSRATRKASRR          | 345 | P47900 | P2RY1_HUMAN |
| 262 | --SQTBDVFDCAENTLIFYVKE                                 | STLWLTSLNA               | CLDPFIYFPLCKSFRNSLISMLKCPNSA | 319 | Q9H244 | P2Y12_HUMAN |
| 269 | LL--S--ISCSIEHQIHEAYIVS                                | PLAALNTFCMLLLYVVVSDNF    | QQAVCSTVRCRVSG               | 323 | Q96P68 | OXGR1_HUMAN |
| 260 | LGSWRQ--YQCT-QVVINSFYIVTR                              | PLAFLNSVINPVVYFL         | LCDFRDLMLMQLRHNFKS           | 316 | Q9BXA5 | SUCR1_HUMAN |
|     | * : : * : *                                            |                          |                              |     |        |             |

Fig. S1. Sequence alignment of hGPR17 with phylogenetically related P2Y, CysLT, and small carboxylic acid receptors. Sequences for human GPR17, CysLT<sub>1</sub> (CLTR1), CysLT<sub>2</sub> (CLTR2), P2Y<sub>1</sub>, P2Y<sub>12</sub>, 2-oxo-glutarate receptor 1 (OXGR1), and succinate receptor 1 (SUCR1) were aligned using Clustal W. Predicted transmembrane domains are

highlighted in yellow. Positively charged residues that likely form part of the orthosteric binding site for the aligned receptors are boxed in red.
