# Supplementary material
Source: PubMed Central journal article supplement (PMC4114018)
Supplement: NIHMS586980-supplement-Fig__S2.pdf [file NIHMS586980-supplement-Fig__S2.pdf]

## Supplemental Figure 2

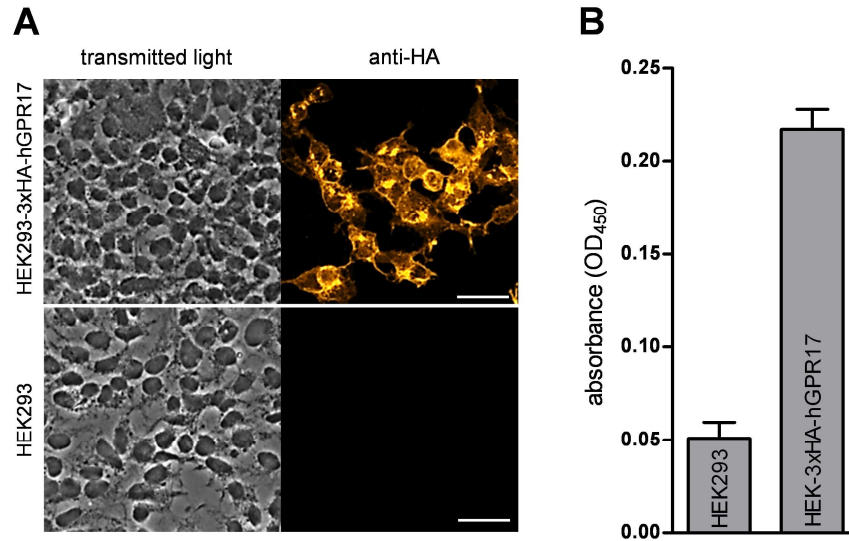

**Fig. S2. GPR17 is properly trafficked to the cell surface.** (A) Immunocytochemical staining. HEK293 cells stably expressing a triple HA epitope-tagged version of hGPR17 (3xHA-hGPR17) and untransfected HEK293 cells were fed with anti-HA monoclonal antibody and were then fixed and stained for the receptor with Alexa Fluor546 goat anti-mouse IgG. Scale bar 25  $\mu$ M. (B) ELISA. Cell surface expression of hGPR17 was assayed by ELISA against the HA-epitope tag in 3xHA-hGPR17 stable transfectants. Absorbance values obtained for native HEK293 cells reflect nonspecific labeling of the cells. (A) One representative image repeated in three occasions; (B) Mean values + S.E.M. from four independent experiments, each performed in triplicate.
