# Supplementary material
Source: PubMed Central journal article supplement (PMC4114018)
Supplement: NIHMS586980-supplement-Fig__S3.pdf [file NIHMS586980-supplement-Fig__S3.pdf]

### Supplemental Figure 3

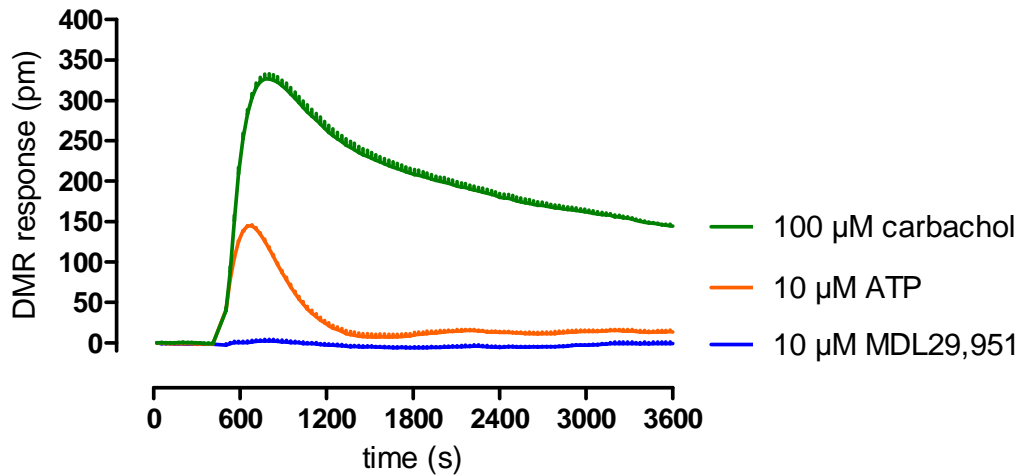

**Fig. S3. Native HEK293 cells are viable and respond to stimuli of endogenously expressed receptors but not to MDL29,951.** HEK293 cells were treated with the indicated concentrations of the muscarinic agonist carbachol, the P2Y receptor agonist ATP, and the GPR17 agonist MDL29,951 and dynamic mass redistribution (DMR) was recorded over time as a measure of receptor activity. Data (mean values + S.E.) shown are representative of at least six independent experiments, each performed in triplicate.
