# Supplementary material
Source: PubMed Central journal article supplement (PMC4114018)
Supplement: NIHMS586980-supplement-Fig__S4.pdf [file NIHMS586980-supplement-Fig__S4.pdf]

## Supplemental Figure 4

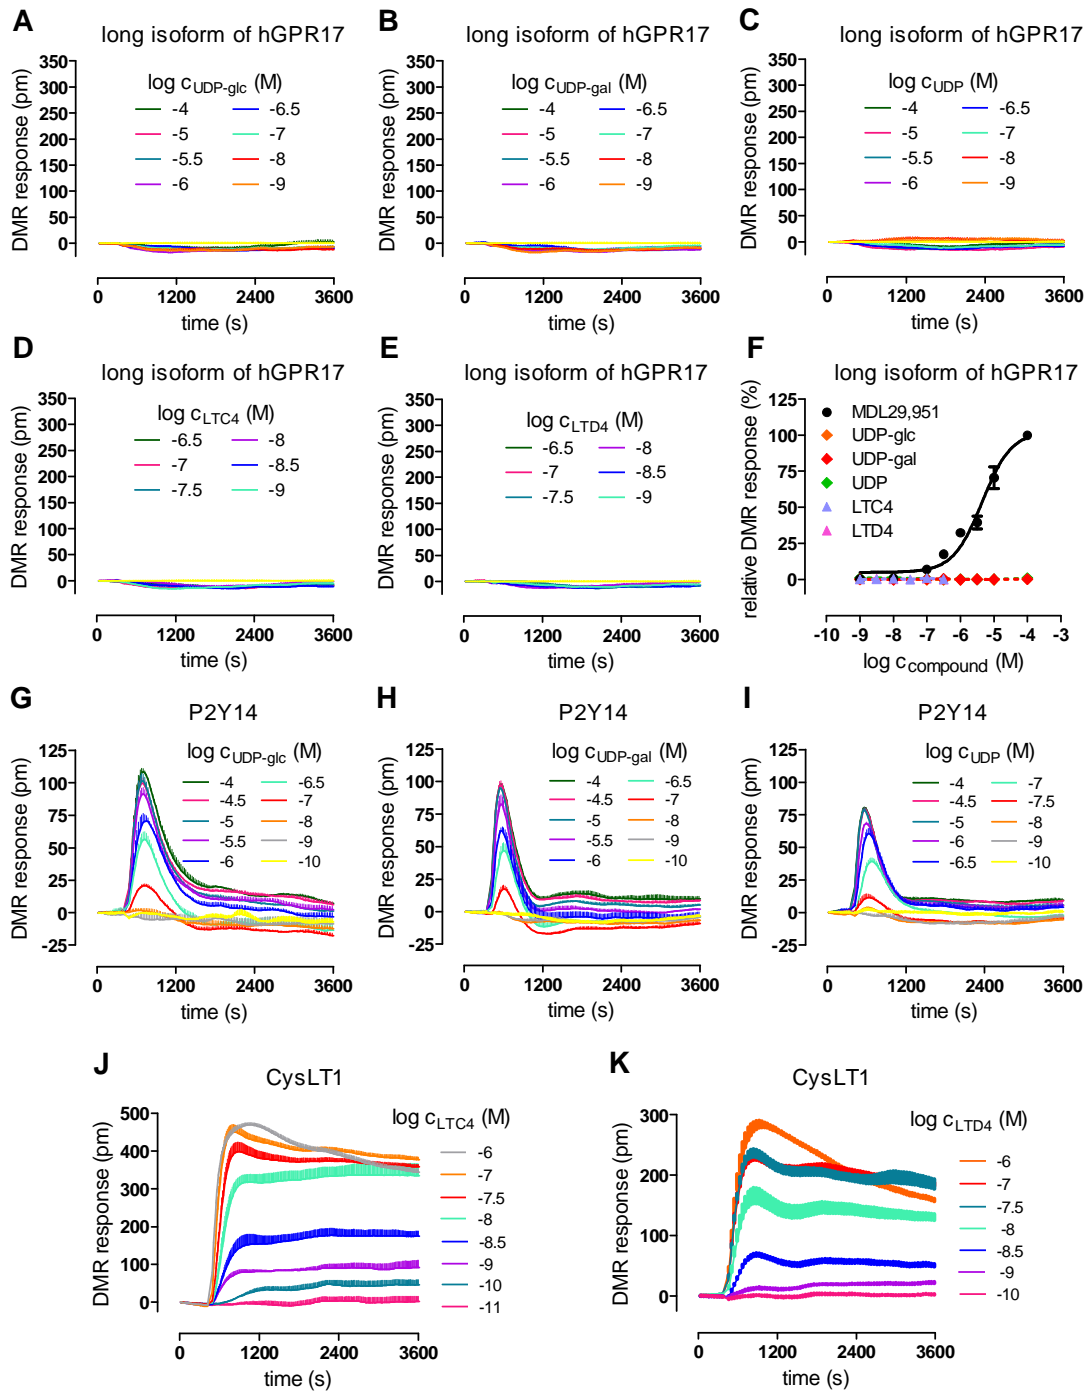

**Fig. S4. Uracil nucleotides and CysLTs do not activate the long isoform of hGPR17 but promote robust activation of their established receptor targets. (A-F) HEK293**

cells were transiently transfected to express the long isoform of hGPR17 and dynamic mass redistribution (DMR) was monitored over time in response to the indicated mediator compounds. (A-E) Representative real-time recordings, mean values + S.E. of triplicate determinations; (F) concentration-effect relationships summarizing the individual experiments in (A-E) with MDL29,951 depicted as positive control (mean values  $\pm$  S.E, n= 3-6). (G-I) DMR recordings of UDP-glucose (G), UDP-galactose (H), and UDP (I) in HEK-P2Y14 stable transfectants. (J,K) DMR recordings of leukotriene C4 (J) and leukotriene D4 (K) in stable HEK-CysLT<sub>1</sub> cells. (G-K) Representative traces, performed in triplicate in three independent assays.
