# Supplementary material
Source: PubMed Central journal article supplement (PMC4114018)
Supplement: NIHMS586980-supplement-Fig__S5.pdf [file NIHMS586980-supplement-Fig__S5.pdf]

## Supplemental Figure 5

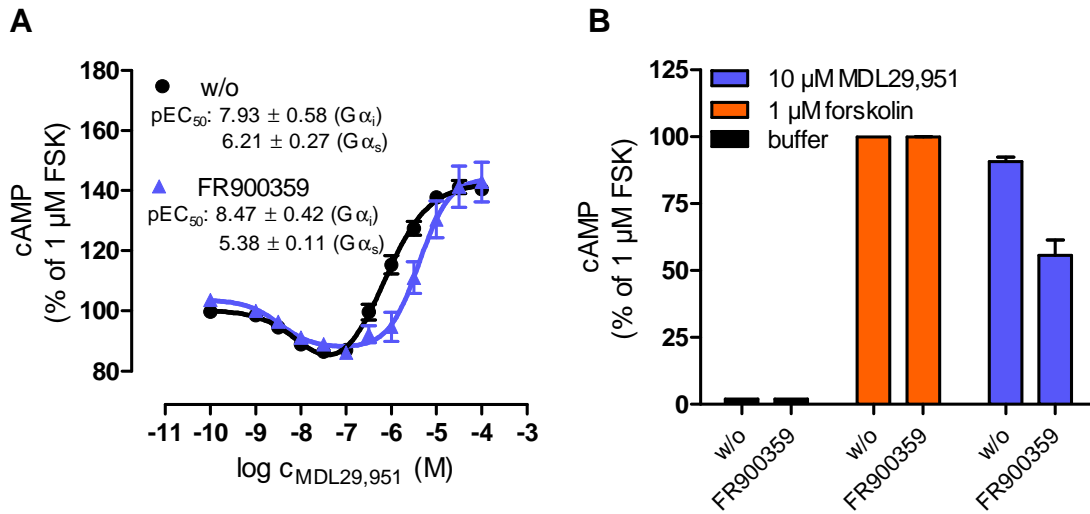

**Fig. S5. Pharmacological silencing of  $G\alpha_q$  proteins attenuates GPR17-mediated cAMP formation.** (A) HEK-hGPR17 cells were stimulated with 1  $\mu$ M forskolin to activate adenylyl cyclase and MDL29,951-mediated inhibition of cAMP formation was quantified in the absence and presence of the  $G\alpha_q$ -selective inhibitor FR900359. (B) HEK-hGPR17 cells were exposed to MDL29,951 at its EC<sub>90</sub> and cAMP accumulation was quantified in the absence and presence of FR900359. Data shown are mean values  $\pm$  S.E.M. (A) or  $\pm$  S.E.M. (B) of 3 to 5 independent experiments, each performed in triplicate.
