# Supplementary material
Source: PubMed Central journal article supplement (PMC4114018)
Supplement: NIHMS586980-supplement-Fig__S6.pdf [file NIHMS586980-supplement-Fig__S6.pdf]

## Supplemental Figure 6

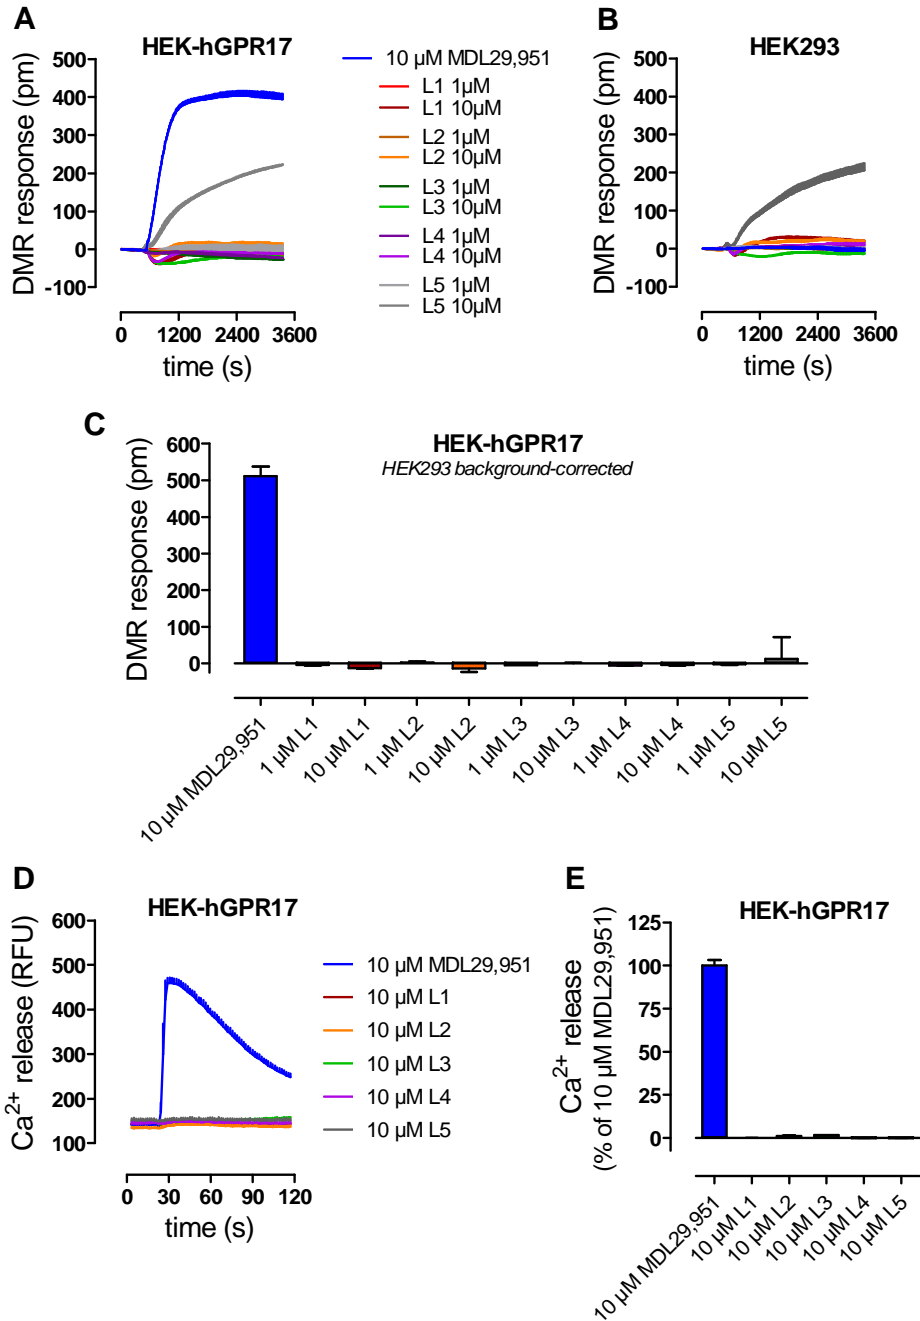

**Fig. S6. HEK-hGPR17 cells are unresponsive to ASINEX ligands 1 to 5 in holistic label-free DMR and Ca<sup>2+</sup> mobilization assays.** (A-C) HEK-hGPR17 (A) and native HEK293 cells (B) were stimulated with the indicated concentrations of MDL29,951 and the

putative GPR17 agonists and receptor activation was assessed as integrated response using dynamic mass redistribution (DMR) technology. Cellular activation by ASINEX ligand 5 does not require GPR17 (compare DMR traces in (A) and (B)). (A,B) Representative real time DMR recordings (+ S.E.); (C) mean values + S.E.M. of two independent experiments, each performed in triplicate. DMR signals in (C) were corrected for background responses in native HEK293 cells. (D and E) HEK-hGPR17 cells were treated with the indicated concentrations of ASINEX ligands 1-5 or GPR17 agonist MDL29,951 and intracellular  $\text{Ca}^{2+}$  mobilization was recorded as a measure of GPR17 functionality. (D) Representative real-time  $\text{Ca}^{2+}$  recordings, performed in triplicate; (E) mean values + S.E., n= 3. RFU: relative fluorescence units.
