# Supplementary material
Source: PubMed Central journal article supplement (PMC4114018)
Supplement: NIHMS586980-supplement-Fig__S7.pdf [file NIHMS586980-supplement-Fig__S7.pdf]

## Supplemental Figure 7

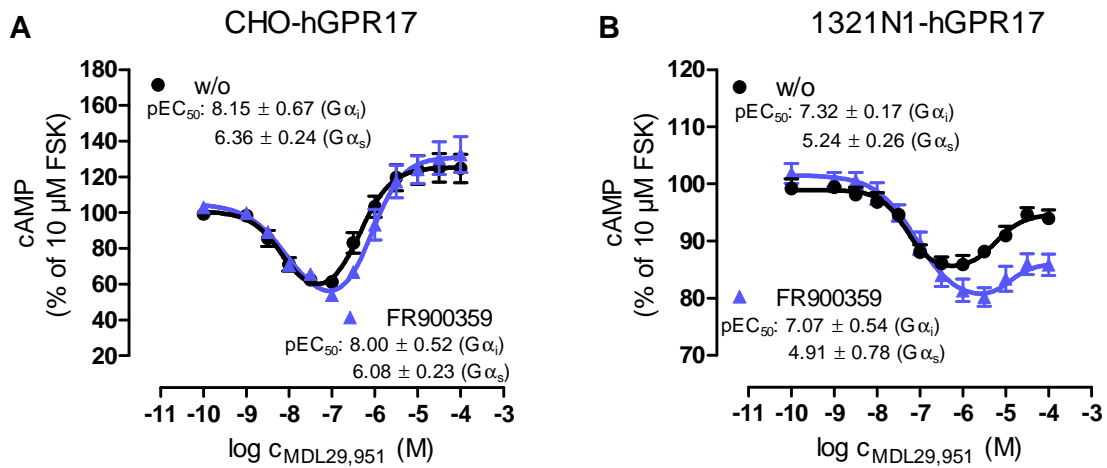

**Fig. S7. Pharmacological silencing of  $G\alpha_q$  proteins does not abolish the capacity of MDL29,951 for dual modulation of adenylyl cyclase.** (A,B) CHO-hGPR17 (A) and 1321N1-hGPR17 cells (B) were stimulated with forskolin to directly activate adenylyl cyclase and MDL29,951-mediated inhibition of cAMP formation was quantified in the absence and presence of the  $G\alpha_q$ -selective inhibitor FR900359. Data are mean values  $\pm$  S.E.M. of 3 (A) or 5 (B) independent experiments, each performed in triplicate.
