# Supplementary material
Source: PubMed Central journal article supplement (PMC4114018)
Supplement: NIHMS586980-supplement-Fig__S8.pdf [file NIHMS586980-supplement-Fig__S8.pdf]

## Supplemental Figure 8

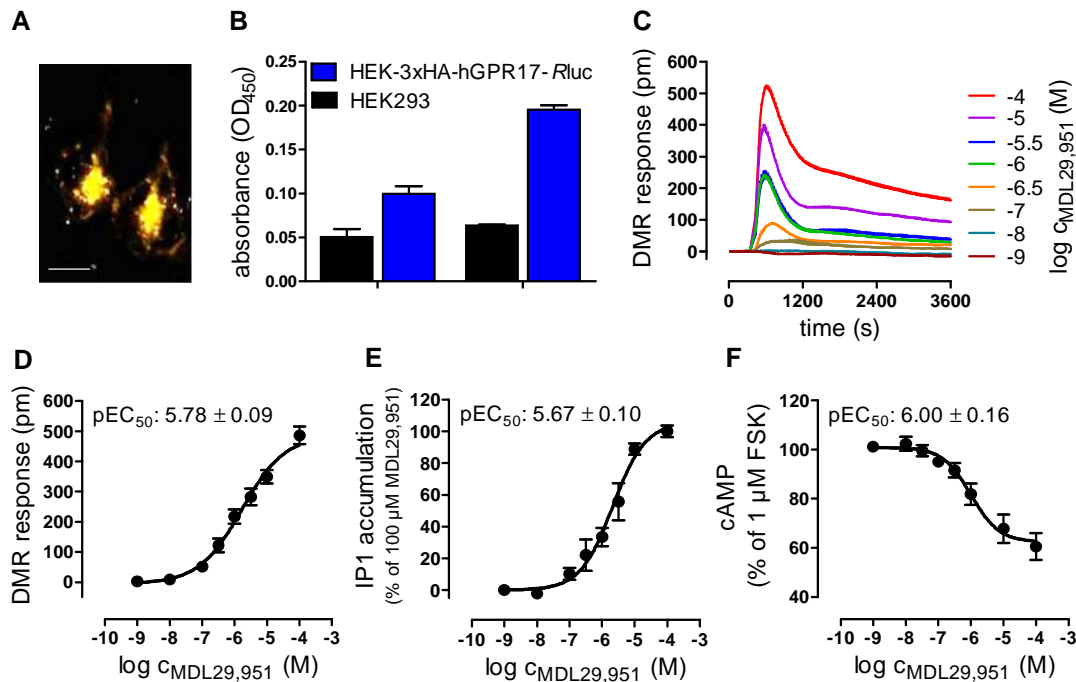

**Fig. S8. GPR17-Rluc fusion protein is targeted to the cell surface and signals via G protein-mediated pathways.** (A) Immunocytochemical staining. HEK293 cells stably expressing 3xHA-hGPR17-Rluc were fed with anti-HA monoclonal antibody and were then fixed and stained for the receptor with Alexa Fluor546 goat anti-mouse IgG. Scale bar 10 μM. (B) ELISA. Cell surface expression of 3xHA-hGPR17-Rluc was quantified by ELISA against the HA-epitope tag. Absorbance values obtained for native HEK293 cells reflect nonspecific labeling of the cells. Data shown are mean values + S.E.M. of five independent experiments, each performed in triplicate. (C,D) Label-free DMR assay. HEK-hGPR17-Rluc cells were stimulated with increasing concentrations of MDL29,951 and DMR was recorded over time. (C) Representative DMR traces (mean + S.E.); (D) concentration-effect-curve derived from traces in (C), mean ± S.E.M., n= 3, each performed

in triplicate. (**E** and **F**) HEK-hGPR17-Rluc cells were stimulated with the indicated concentrations of MDL29,951 and levels of intracellular inositolphosphate IP1 (**E**) or inhibition of forskolin-mediated cAMP production (**F**) were quantified. Data are mean  $\pm$  S.E.M. of at least three independent experiments, each performed in triplicate.
