# Supplementary material
Source: PubMed Central journal article supplement (PMC4114018)
Supplement: NIHMS586980-supplement-Fig__S9.pdf [file NIHMS586980-supplement-Fig__S9.pdf]

## Supplemental Figure 9

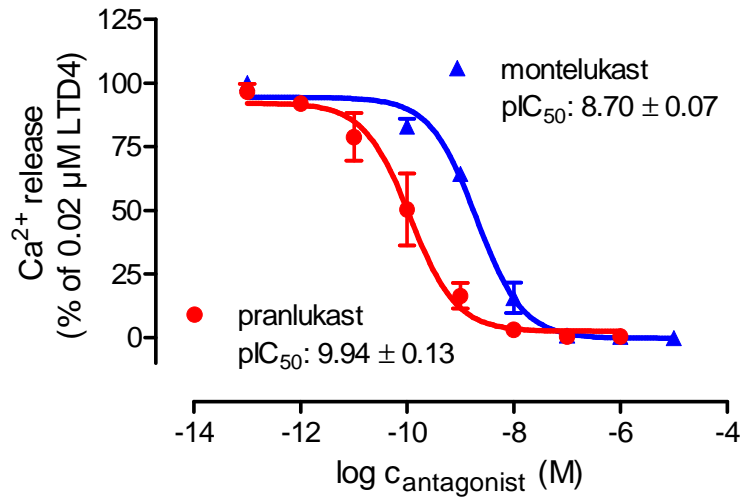

**Fig. S9. CysLT<sub>1</sub> antagonists effectively inhibit intracellular Ca<sup>2+</sup> mobilization by the CysLT<sub>1</sub> receptor.** HEK293 cells stably expressing the FLAG-CysLT<sub>1</sub> receptor were pre-treated with the indicated concentrations of the CysLT<sub>1</sub> antagonists pranlukast and montelukast for 30 min prior to addition of leukotriene D<sub>4</sub> (LTD<sub>4</sub>) at its EC<sub>80</sub> concentration, and mobilization of intracellular Ca<sup>2+</sup> was measured with the Calcium 5 assay kit. Data are mean values ± S.E.M. of n= 3 to 4 independent experiments, each performed in triplicate.
