# Supplementary material
Source: PubMed Central journal article supplement (PMC4114018)
Supplement: NIHMS586980-supplement-Fig__S10.pdf [file NIHMS586980-supplement-Fig__S10.pdf]

## Supplemental Figure 10

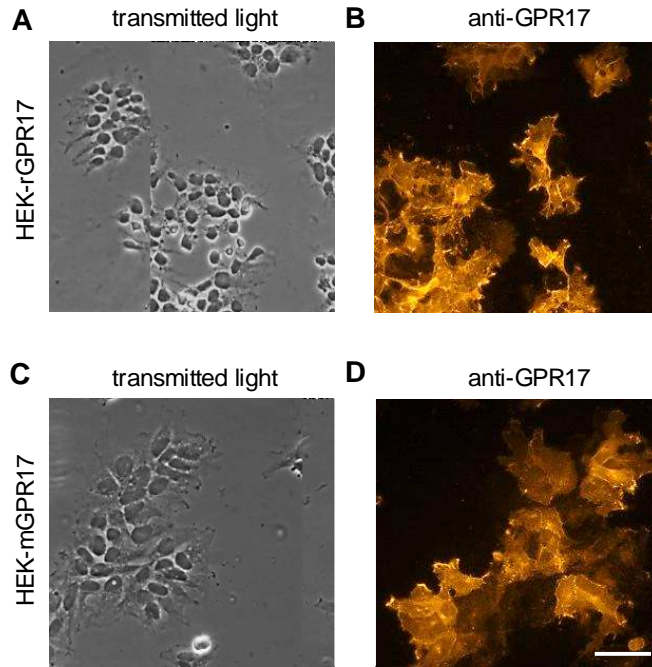

**Fig. S10. Mouse and rat orthologs of GPR17 are targeted to the plasma membrane in HEK293 cells engineered to stably express these receptors. (A to D)** Transmitted light image and immunocytochemical staining of stable HEK-rGPR17 (A and B) or HEK-mGPR17 (C and D) cells grown on coverslips in 24-well dishes. Cells were fed with rabbit anti-GPR17 antibody and were then fixed and stained for the receptor with Cy3-conjugated goat anti-rabbit antibody. Scale bars 50  $\mu$ M.
