# Supplementary material
Source: PubMed Central journal article supplement (PMC4114018)
Supplement: NIHMS586980-supplement-Fig__S11.pdf [file NIHMS586980-supplement-Fig__S11.pdf]

# Supplemental Figure 11

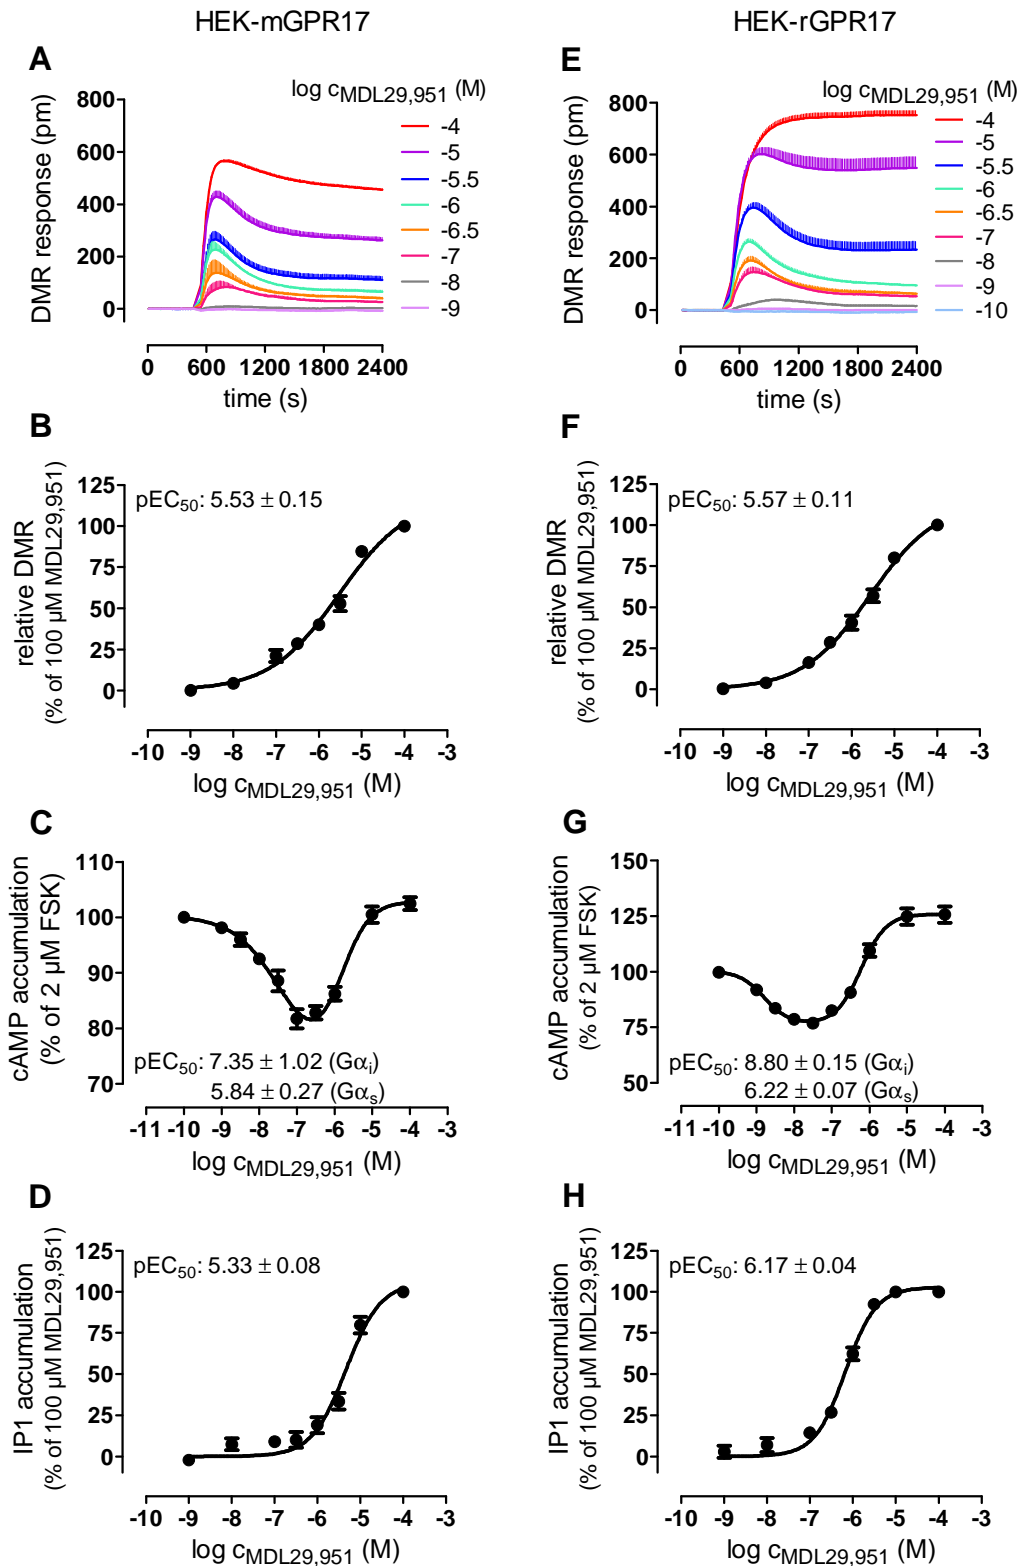

**Fig. S11. MDL29,951 productively interacts with rodent GPR17 orthologs. (A-D)** HEK-mGPR17 cells were stimulated with the indicated concentrations of MDL29,951 and DMR ((A) representative traces, (B) concentration-effect curve derived from the traces in (A)), inhibition of forskolin-stimulated cAMP production (C), and inositolphosphate IP1 accumulation (D) were recorded as a measure of receptor functionality. **(E-H)** HEK-rGPR17 cells were stimulated with the indicated concentrations of MDL29,951 and DMR [(E) representative traces; (F) concentration-effect curves derived from the traces in (E)], inhibition of forskolin-stimulated cAMP production (G), and inositolphosphate IP1 accumulation (H) were recorded as a measure of receptor functionality. (A and E) Data are mean + S.E. of representative DMR recordings repeated at least three times each in triplicate. (B-D, and F-H) Data are mean  $\pm$  S.E.M. of at least three independent experiments, each performed in triplicate.
