# Supplementary material
Source: PubMed Central journal article supplement (PMC4114018)
Supplement: NIHMS586980-supplement-Fig__S12.pdf [file NIHMS586980-supplement-Fig__S12.pdf]

## Supplemental Figure 12

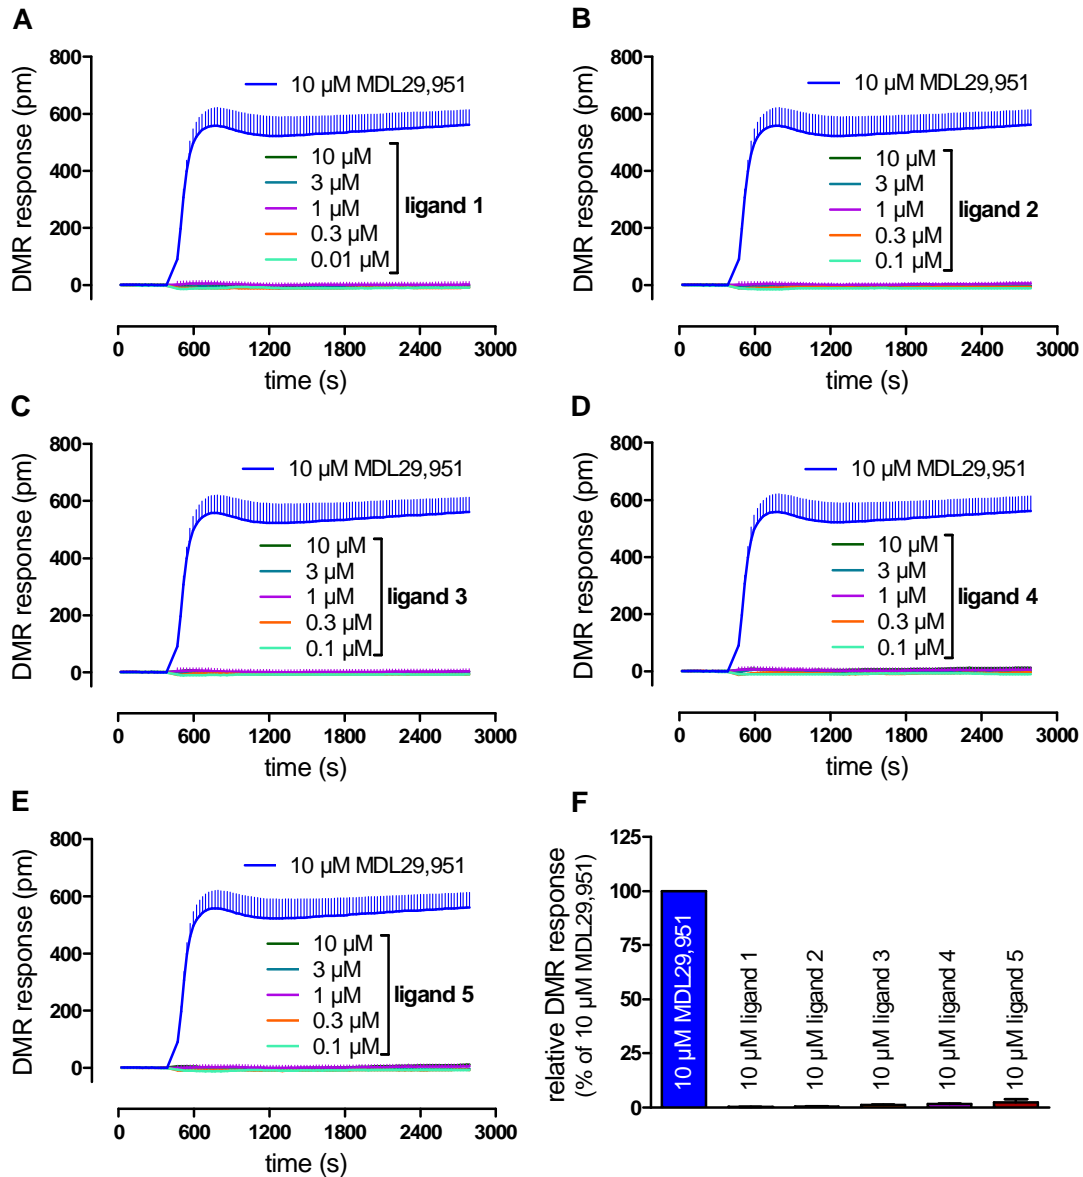

**Fig. S12.** MDL29,951 but not ASINEX ligands 1 to 5, display functional activity on rat GPR17. HEK-rGPR17 cells were stimulated with the indicated concentrations of ASINEX ligands 1-5 or the GPR17 agonist MDL29,951 as control and DMR was recorded over time. (A-E) Data are representative traces of mean + S.E., repeated independently twice; (F) Data are mean + S.E.M. of n= 2 independent experiments, each performed in triplicate.
