# Supplementary material
Source: PubMed Central journal article supplement (PMC4114018)
Supplement: NIHMS586980-supplement-Fig__S14.pdf [file NIHMS586980-supplement-Fig__S14.pdf]

## Supplemental Figure 14

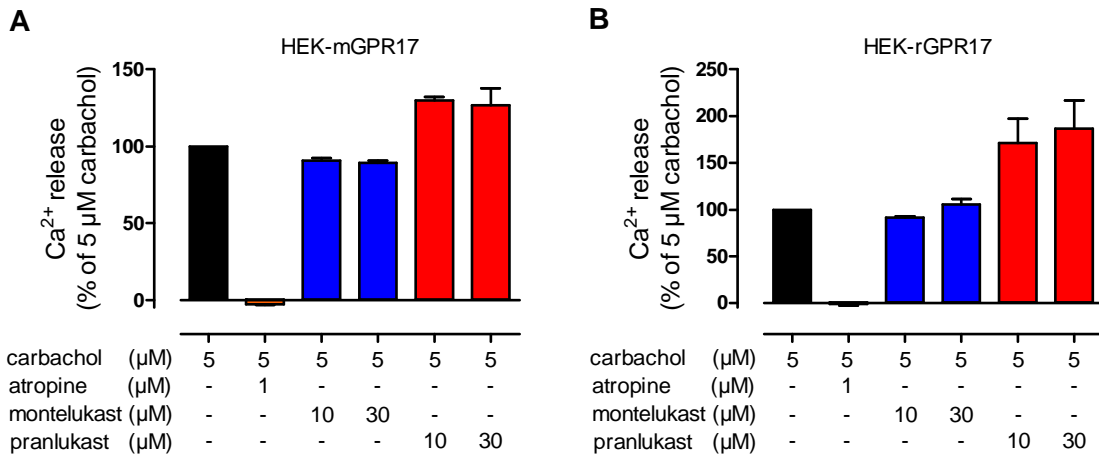

**Fig. S14. Pranlukast and montelukast do not dampen  $Ca^{2+}$  signaling of muscarinic  $M_3$  receptors.** HEK-mGPR17 (**A**) and HEK-rGPR17 cells (**B**) were pre-treated with the indicated concentrations of CysLT<sub>1</sub> antagonists pranlukast and montelukast, respectively, or muscarinic antagonist atropine prior to stimulation with the muscarinic agonist carbachol at its EC<sub>80</sub> concentration and intracellular  $Ca^{2+}$  flux was quantified. Muscarinic receptor signaling is completely blunted by atropine but not by CysLT<sub>1</sub> antagonists. Data are mean values + S.E.M of two independent experiments, each performed in triplicate.
