# Supplementary material
Source: PubMed Central journal article supplement (PMC4114018)
Supplement: NIHMS586980-supplement-Fig__S15.pdf [file NIHMS586980-supplement-Fig__S15.pdf]

## Supplemental Figure 15

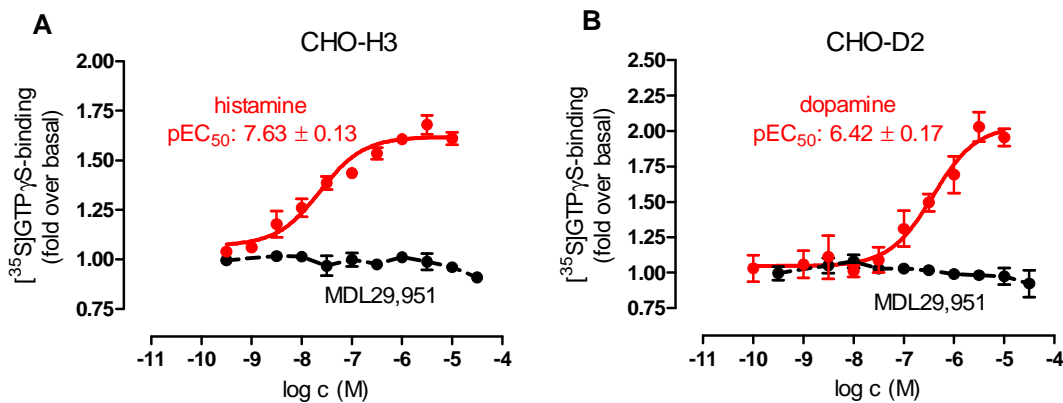

**Fig. S15.** MDL29,951 does not stimulate loading of  $[^{35}\text{S}]\text{GTP}\gamma\text{S}$  to membranes expressing biogenic amine histamine  $\text{H}_3$  and dopamine  $\text{D}_2$  receptors.  $[^{35}\text{S}]\text{GTP}\gamma\text{S}$  binding to  $\text{H}_3$ -expressing cell membranes (**A**) or  $\text{D}_2$ -expressing membranes (**B**). Histamine and dopamine were used as controls for full stimulation of receptors. Data are mean  $\pm$  S.E.M.,  $n = 3$  independent experiments, each performed in triplicate.
