# Supplementary material
Source: PubMed Central journal article supplement (PMC4114018)
Supplement: NIHMS586980-supplement-Fig__S16.pdf [file NIHMS586980-supplement-Fig__S16.pdf]

## Supplemental Figure 16

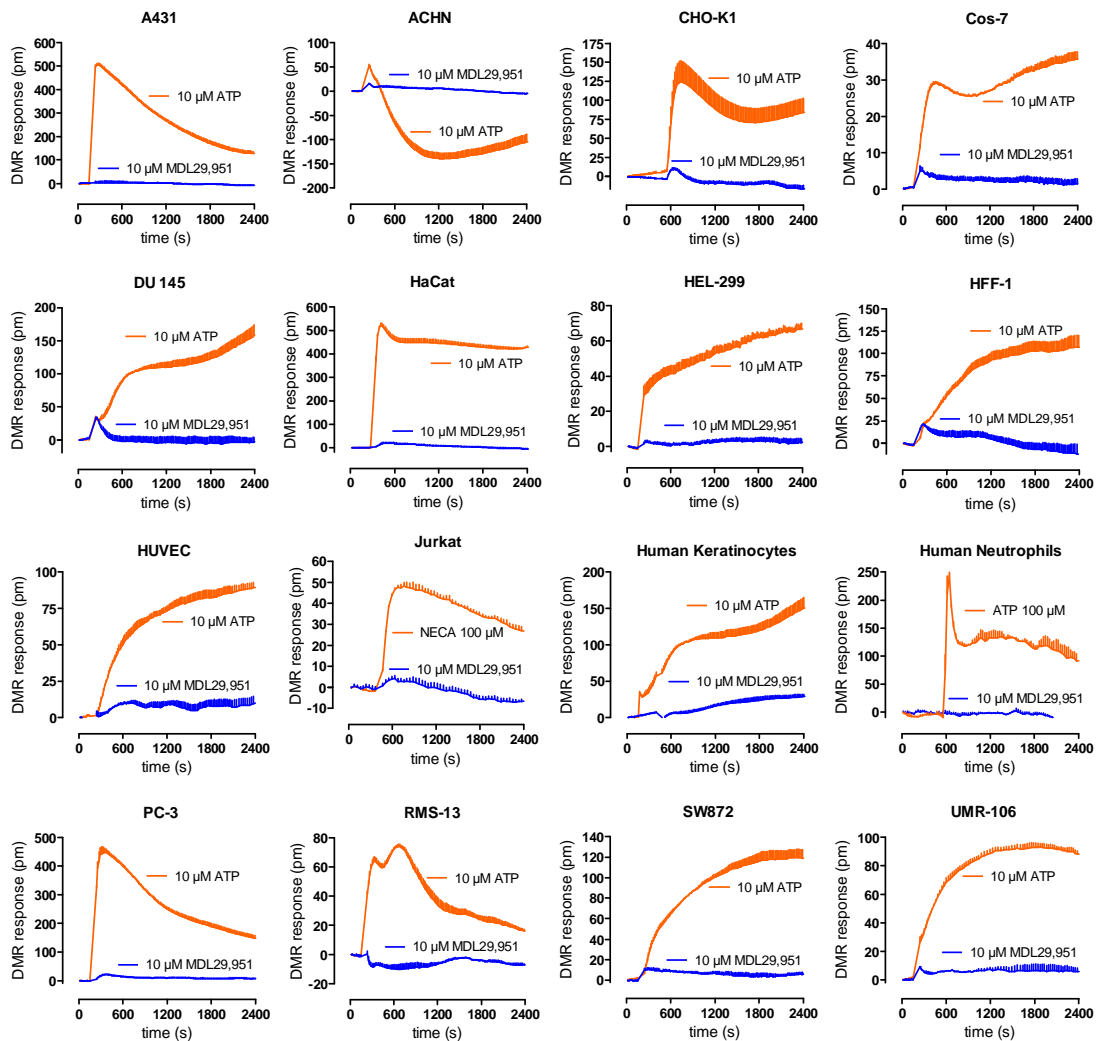

**Fig. S16. MDL29,951 does not trigger cell activation across 16 distinct ATP-responsive immortalized and primary cell lines in a receptor panning approach.** To trace functional endogenous receptors using ligands as a bait, cells were stimulated with the indicated concentrations of ATP (P2Y<sub>1,2,4,6,11</sub> agonist), the adenosine A<sub>2a</sub> receptor agonist NECA, and GPR17 agonist MDL29,951 and label-free DMR responses were recorded over time. No endogenous MDL29,951-responsive receptor is detected. Data are mean + S.E. of representative DMR recordings repeated at least twice in triplicate.
