# Supplementary material
Source: PubMed Central journal article supplement (PMC4114018)
Supplement: NIHMS586980-supplement-Fig__S17.pdf [file NIHMS586980-supplement-Fig__S17.pdf]

## Supplemental Figure 17

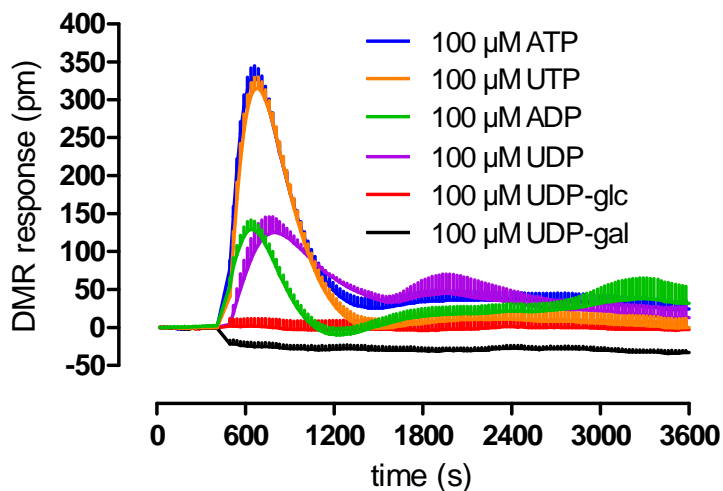

**Fig. S17. HEK293 cells express functional P2Y receptors as evidenced by their responsiveness to purinergic agonists.** HEK293 cells constitutively expressing P2Y<sub>1,2,4,11,12,13</sub> (*49-51*) were stimulated with the indicated concentrations of ATP (P2Y<sub>1,2,4,11</sub> agonist), UTP (P2Y<sub>2,4,6,11</sub> agonist), ADP (P2Y<sub>1,12,13</sub> agonist), UDP (P2Y<sub>6</sub> agonist), UDP-glucose, and UDP-galactose (both P2Y<sub>14</sub> agonists) and DMR was recorded over time. Data are mean + S.E. of a representative experiment, repeated four times in triplicate.
