# Supplementary material
Source: PubMed Central journal article supplement (PMC4114018)
Supplement: NIHMS586980-supplement-Fig__S19.pdf [file NIHMS586980-supplement-Fig__S19.pdf]

## Supplemental Figure 19

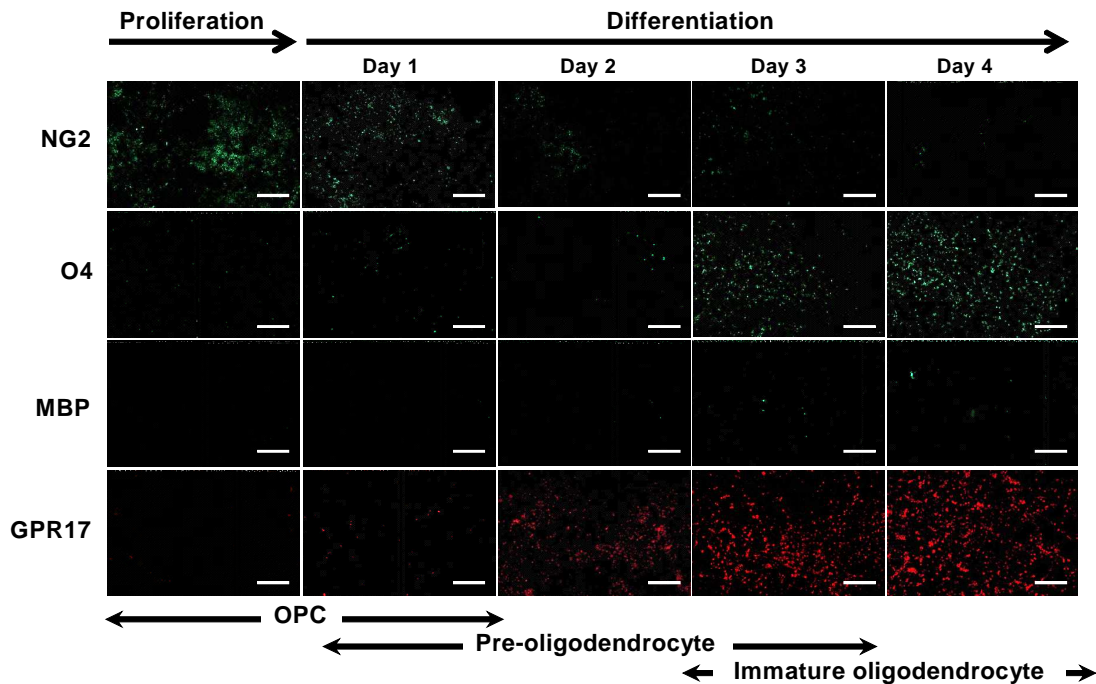

**Fig. S19. Immunophenotypes of oligodendroglial cells during differentiation.** Primary oligodendrocyte precursor cells were obtained with the shaking method (64) from mixed glial cultures using postnatal day 1 or 2 Wistar rat cerebrum. At the indicated times in culture (day1- day4), cells were fixed with paraformaldehyde and immunophenotyped with the following markers: NG2 for oligodendrocyte precursor cells (OPCs), O4 for immature and mature oligodendrocytes, and myelin basic protein (MBP) for ramified, mature oligodendrocytes. At all times cells were co-stained with anti-GPR17 antibody. Peak expression of GPR17 was observed on day 4 in culture and this day was chosen to assess functionality of the GPR17 agonist MDL29,951. Shown are images of purified primary rat oligodendrocytes representative for the inspected cell population. Immunocytochemical experiments were repeated at least 4 times with independent rat pup cultures. Scale bar 200  $\mu$ M.
