# Supplementary material
Source: PubMed Central journal article supplement (PMC4114018)
Supplement: NIHMS586980-supplement-Fig__S20.pdf [file NIHMS586980-supplement-Fig__S20.pdf]

## Supplemental Figure 20

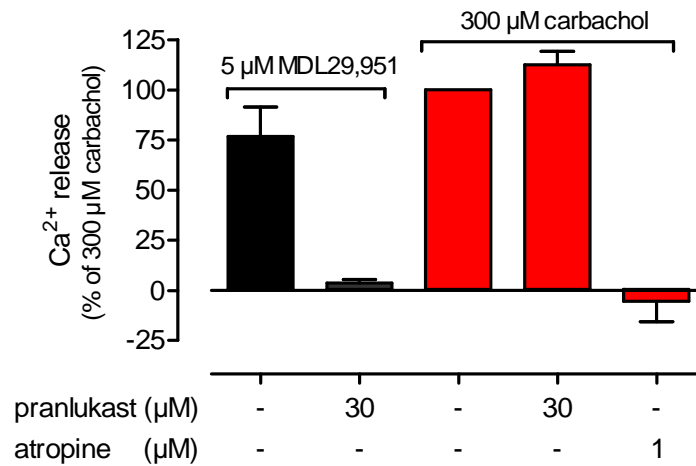

**Fig. S20. Pranlukast abolishes GPR17-mediated Ca<sup>2+</sup> mobilization but does not blunt Ca<sup>2+</sup> signaling induced by muscarinic M<sub>3</sub> receptors in primary rat oligodendrocytes.**

Primary rat oligodendrocytes were pre-treated with pranlukast or the muscarinic antagonist atropine for 30 min prior to stimulation with the indicated concentrations of MDL29,951 or carbachol and intracellular Ca<sup>2+</sup> mobilization was quantified. Data are mean + S.E.M. of three independent experiments, each performed in triplicate.
