# Supplementary material
Source: PubMed Central journal article supplement (PMC4114018)
Supplement: NIHMS586980-supplement-Fig__S21.pdf [file NIHMS586980-supplement-Fig__S21.pdf]

## Supplemental Figure 21

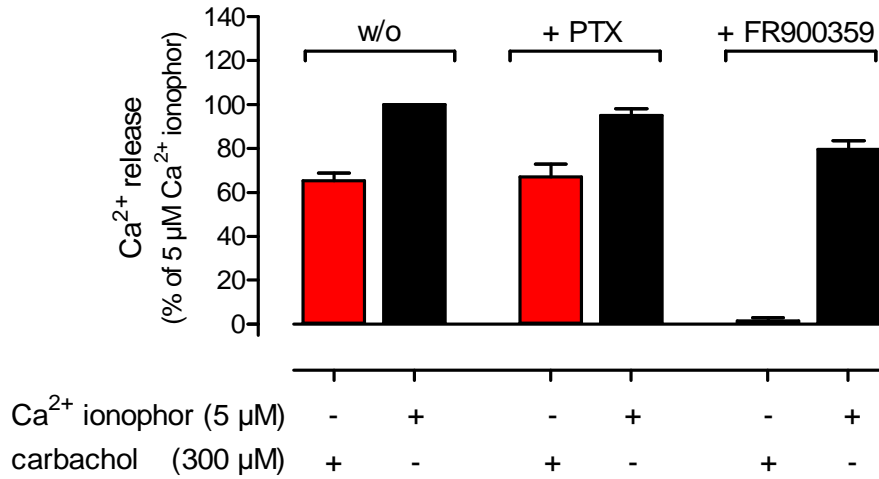

**Fig. S21.  $G\alpha_i$  inhibitor PTX and  $G\alpha_q$  inhibitor FR900359 do not affect viability of primary rat oligodendrocytes.** Primary rat oligodendrocytes pre-treated or not with 50 ng/ml PTX or  $G\alpha_q$  inhibitor FR900359 were stimulated with solvent control (w/o), muscarinic agonist carbachol, or calcium ionophor A23187 and intracellular  $Ca^{2+}$  mobilization was monitored. FR900359 specifically obliterates signaling of the  $G\alpha_q$ -linked muscarinic  $M_3$  receptor, but does not abolish  $Ca^{2+}$  flux triggered by a non-receptor stimulus. Data are mean + S.E.M. of two independent experiments, each performed in triplicate.
