# Supplementary material
Source: PubMed Central journal article supplement (PMC4114018)
Supplement: NIHMS586980-supplement-Fig__S22.pdf [file NIHMS586980-supplement-Fig__S22.pdf]

## Supplemental Figure 22

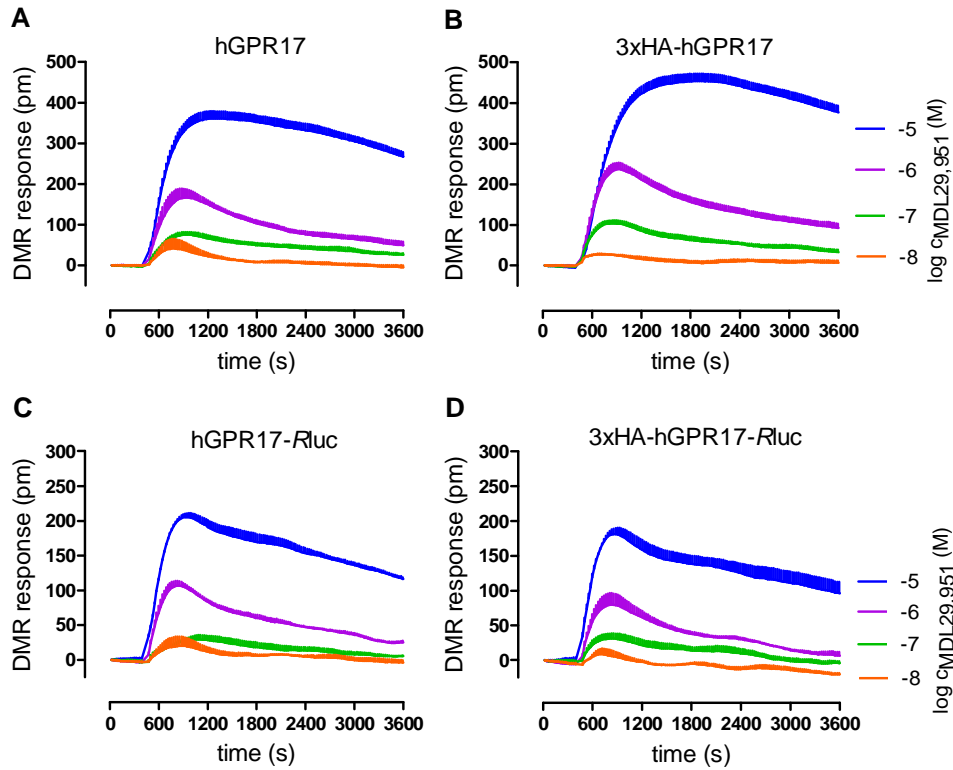

**Fig. S22. Introduction of a triple HA tag at the N termini of hGPR17 and hGPR17-Rluc does not alter signaling capacity of the receptor constructs.** HEK293 cells transfected to express the indicated untagged (A,C) and tagged (B,D) GPR17 constructs were stimulated with the GPR17 agonist MDL29,951 and DMR was recorded over time. Data are representative real-time DMR traces (mean + S.E.), repeated at least three times in triplicate with independent transfections.
