# Supplementary material
Source: PubMed Central journal article supplement (PMC4114018)
Supplement: NIHMS586980-supplement-Fig__S23.pdf [file NIHMS586980-supplement-Fig__S23.pdf]

## Supplemental Figure 23

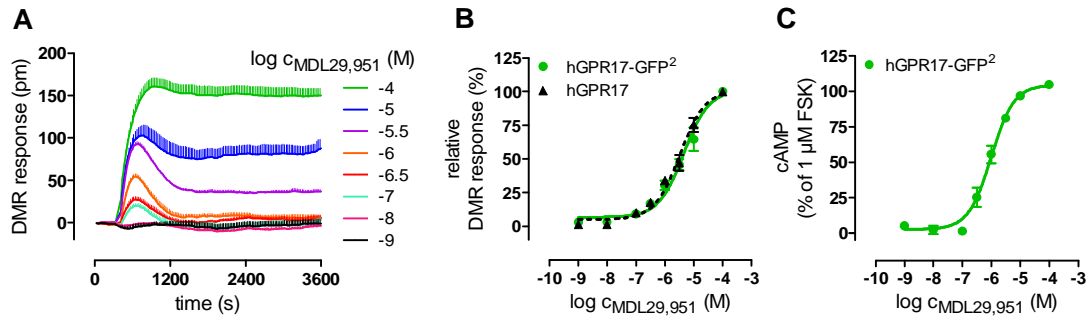

**Fig. S23. In-frame fusion of GFP<sup>2</sup> to the C terminus of GPR17 does not affect receptor functionality.** HEK293 cells transiently transfected to express a GPR17-GFP<sup>2</sup> fusion protein were stimulated with the indicated concentrations of GPR17 agonist MDL29,951 and DMR (A and B) or intracellular cAMP accumulation (C) was recorded over time. (A) Data are representative real-time DMR traces (mean + S.E.), repeated at least three times in triplicate with independent transfections. (B) Data are mean values ± S.E.M. concentration-effect curves derived from the traces in (A) (n= 6); hGPR17 is included for sake of comparison. (C) Data are mean ± S.E.M. from four independent transfections.
