# Supplementary material
Source: PubMed Central journal article supplement (PMC4114018)
Supplement: NIHMS586980-supplement-Fig__S24.pdf [file NIHMS586980-supplement-Fig__S24.pdf]

## Supplemental Figure 24

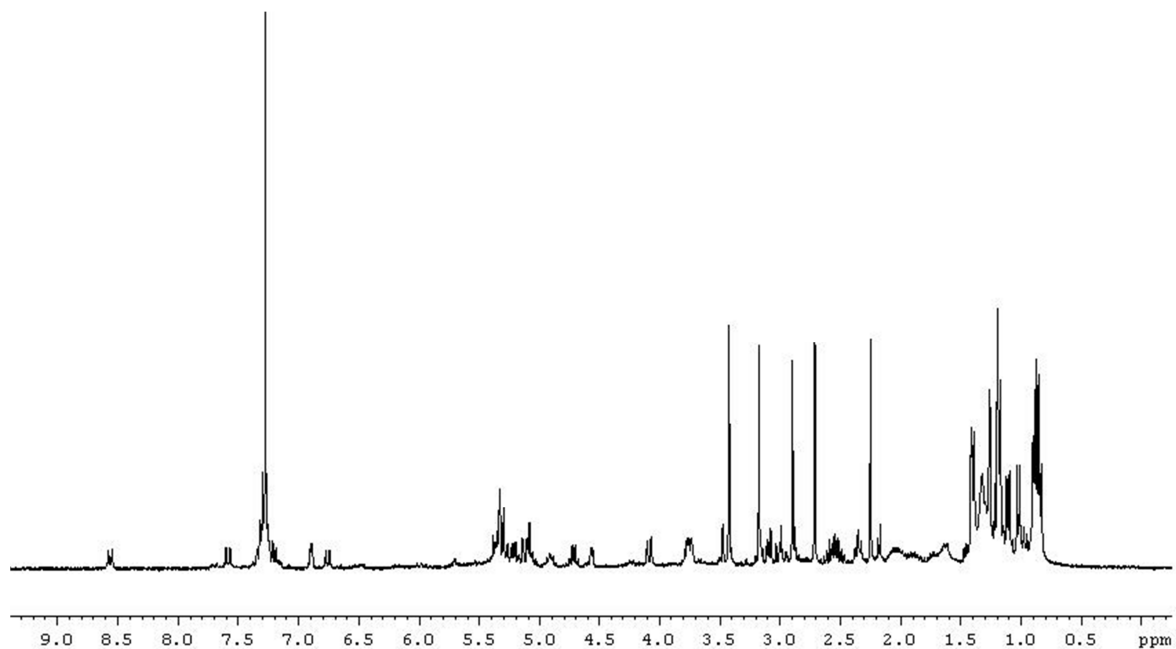

**Fig. S24.**  $^1\text{H-NMR}$  spectrum of FR900359 in  $\text{CDCl}_3$ . (300 MHz, Bruker Avance DPX; the spectrum was referenced to the residual solvent signal with resonance at  $\delta_{\text{H}} = 7.26$  ppm). The  $^1\text{H-NMR}$  data is in full agreement with the structure of FR900359 and with literature data (30). The  $^1\text{H-NMR}$  spectrum shows five characteristic singlets for one acetyl, one *O*-methyl, and three *N*-methyl groups in the range of  $\delta$  2.2 – 3.4 ppm. Also evident are the resonances for the aromatic protons of the phenylalanine moiety in the region of  $\delta$  7.28 ppm.
