# Supplementary material
Source: PubMed Central journal article supplement (PMC4114018)
Supplement: NIHMS586980-supplement-Fig__S25.pdf [file NIHMS586980-supplement-Fig__S25.pdf]

## Supplemental Figure 25

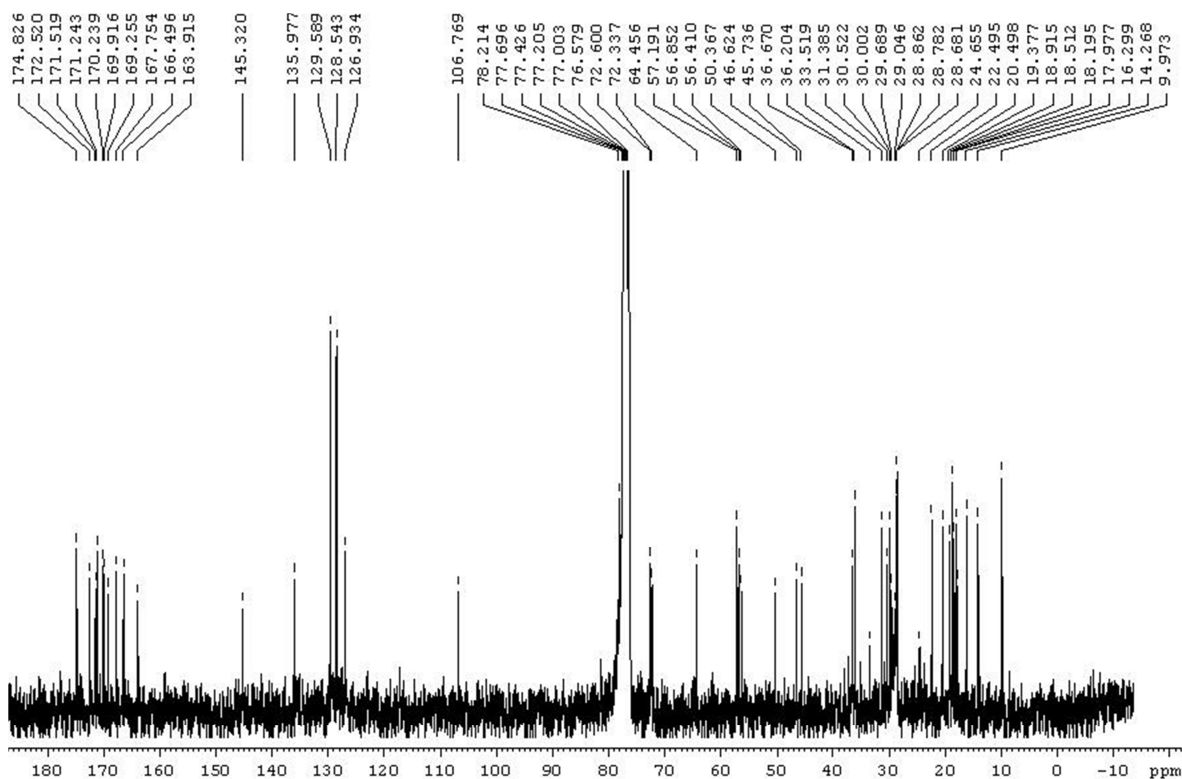

**Fig. S25.** <sup>13</sup>C-NMR spectrum of FR900359 in CDCl<sub>3</sub>. (75 MHz, Bruker Avance DPX; the spectrum was referenced to the residual solvent signal with resonance at δ<sub>C</sub> = 77.0 ppm). The <sup>13</sup>C-NMR spectrum shows a total of 49 resonances attributable for 15 methyl, 3 methylene, 19 methine groups, and 12 quaternary carbons. 10 resonances in the region of δ 163 – 175 ppm are indicative for 7 amide and 3 ester carbonyls. The <sup>13</sup>C-NMR spectrum is consistent with the structure of the Gα<sub>q</sub> inhibitor FR900359 (30).
