# Supplementary material
Source: PubMed Central journal article supplement (PMC4114018)
Supplement: NIHMS586980-supplement-Table_S1.pdf [file NIHMS586980-supplement-Table_S1.pdf]

### Supplemental Table 1

| Test compound               | Test concentration | Chemical structure                                                                    |
|-----------------------------|--------------------|---------------------------------------------------------------------------------------|
| 5-Aminolevulinic acid       | 100 $\mu$ M – 1 mM | 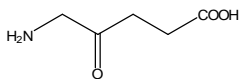   |
| Citric acid                 | 30 $\mu$ M         |    |
| p-Coumaric acid             | 30 $\mu$ M         |    |
| Ferulic acid                | 30 $\mu$ M         |    |
| Folic acid                  | 30 $\mu$ M         |    |
| Fumaric acid                | 30 $\mu$ M         |  |
| $\gamma$ -Aminobutyric acid | 30 $\mu$ M         |  |
| Gavestinel                  | 1-100 $\mu$ M      |   |
| 5-Hydroxyindoleacetic acid  | 30 $\mu$ M         |  |

|                            |                    |                                                                                       |
|----------------------------|--------------------|---------------------------------------------------------------------------------------|
| Kynurenic acid             | 30 $\mu$ M         | 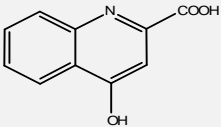   |
| 5,7-Dichlorokynurenic acid | 30 $\mu$ M         |    |
| LTC <sub>4</sub>           | 0.01 nM-1 $\mu$ M  |     |
| LTD <sub>4</sub>           | 0.1 nM – 1 $\mu$ M |    |
| MDL29,951                  | 1 nM – 100 $\mu$ M |  |
| Orotic acid                | 30 $\mu$ M         |  |
| Porphobilinogen            | 10 $\mu$ M         |  |

|                 |                      |                                                                                       |
|-----------------|----------------------|---------------------------------------------------------------------------------------|
| Quinolinic acid | 30 $\mu$ M           | 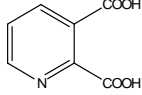   |
| Succinic acid   | 30 $\mu$ M           |    |
| Tryptophane     | 30 $\mu$ M           |    |
| Tyrosine        | 30 $\mu$ M           |    |
| UDP             | 0.1 nM – 100 $\mu$ M |    |
| UDP-galactose   | 0.1 nM – 100 $\mu$ M |   |
| UDP-glucose     | 0.1 nM – 100 $\mu$ M |   |
| Uric acid       | 30 $\mu$ M           |  |

**Table S1. Chemical structures of test compounds selected for biomolecular screening at GPR17.** Molecules that qualified for the biomolecular screening contain at least one negative charge and/or represent precursors or intermediates of metabolic pathways with particular links to CNS activity. The concentration(range) applied in the biomolecular screening is indicated. UDP: uridine-diphosphate.
