# Supplementary material
Source: PubMed Central journal article supplement (PMC4114018)
Supplement: NIHMS586980-supplement-Table_S2.pdf [file NIHMS586980-supplement-Table_S2.pdf]

## Supplemental Table 2

| assay                   | HEK-hGPR17                | CHO-hGPR17                | 1321N1-hGPR17             |
|-------------------------|---------------------------|---------------------------|---------------------------|
| DMR                     | 6.47 ± 0.09               | 6.55 ± 0.06               | 6.53 ± 0.06               |
| Bio-impedance           | 6.69 ± 0.10*              | 7.05 ± 0.05               | 6.15 ± 0.07               |
| cAMP                    | $G\alpha_i$ : 7.93 ± 0.58 | $G\alpha_i$ : 8.15 ± 0.67 | $G\alpha_i$ : 7.32 ± 0.17 |
|                         | $G\alpha_s$ : 6.21 ± 0.27 | $G\alpha_s$ : 6.36 ± 0.24 | $G\alpha_s$ : 5.24 ± 0.26 |
| [ <sup>35</sup> S]GTPγS | 6.53 ± 0.19               | 5.42 ± 0.11               | 5.18 ± 0.15               |
| IP1                     | 6.51 ± 0.06               | 7.05 ± 0.07               | n.a.                      |
| Ca <sup>2+</sup>        | 7.18 ± 0.06               | 7.08 ± 0.05               | 6.15 ± 0.07               |

**Table S2. Potencies (pEC<sub>50</sub> values) of MDL29,951 at recombinant hGPR17 cell lines.**

Functional parameters of GPR17 activation by MDL29,951 in the indicated cell lines were determined in label-free assay platforms based on dynamic mass redistribution (DMR) or bio-impedance and classical second messenger assays monitoring accumulation of inositolphosphates (IP1), cAMP, or Ca<sup>2+</sup> as well as incorporation of [<sup>35</sup>S]GTPγS into Gα subunits of heterotrimeric G proteins. Values are mean pEC<sub>50</sub> ± S.E.M. for at least three independent experiments, each performed in triplicate. n.a., no activity. \* pEC<sub>50</sub> value for the first inflection point of the concentration effect curve.
