# Supplementary material
Source: PubMed Central journal article supplement (PMC4114018)
Supplement: NIHMS586980-supplement-Table_S3.pdf [file NIHMS586980-supplement-Table_S3.pdf]

### Supplemental Table 3

| receptor                | relative DMR of<br>10 $\mu$ M MDL29,951<br>(% of full agonist) | $\pm$ S.E.M. | n |
|-------------------------|----------------------------------------------------------------|--------------|---|
| P2Y <sub>1</sub>        | -3.24                                                          | 3.12         | 2 |
| P2Y <sub>2</sub>        | -3.42                                                          | 2.54         | 2 |
| P2Y <sub>4</sub>        | -8.10                                                          | 4.05         | 2 |
| P2Y <sub>6</sub>        | -4.67                                                          | 11.56        | 2 |
| P2Y <sub>11</sub>       | 23.01                                                          | 3.34         | 2 |
| P2Y <sub>12</sub>       | -9.95                                                          | 5.94         | 2 |
| P2Y <sub>13</sub>       | 4.95                                                           | 4.69         | 2 |
| P2Y <sub>14</sub>       | -9.82                                                          | 4.77         | 2 |
| Flag-CysLT <sub>1</sub> | -3.65                                                          | 3.53         | 3 |

**Table S3. Functional activity of GPR17 agonist MDL29,951 on purinergic and CysLT<sub>1</sub> receptors.** Cell lines expressing the indicated receptors were stimulated with MDL29,951 and functional activity was determined in label-free DMR assays (for representative traces see **Fig. 5**). Full activation of each receptor was achieved with cognate receptor agonists: 100  $\mu$ M ADP for P2Y<sub>1</sub>, P2Y<sub>12</sub>, P2Y<sub>13</sub>; 100  $\mu$ M UTP for P2Y<sub>2</sub>, P2Y<sub>4</sub>; 100  $\mu$ M UDP for P2Y<sub>6</sub>; 100  $\mu$ M ATP for P2Y<sub>11</sub>; 100  $\mu$ M ADP for P2Y<sub>12</sub>, P2Y<sub>13</sub>; 100  $\mu$ M UDP-glucose for P2Y<sub>14</sub>, and 1  $\mu$ M LTD4 for CysLT<sub>1</sub>. Data are mean  $\pm$  S.E.M., n= 2 to 3 independent experiments, each performed in triplicate.
